# Supplementary material
Source: Elsevier journal article supplement (https://git.physik.uzh.ch/gitbucket/mchrzasz/Lecture_repo/raw/65d6c0f6fb0520127a71a4de4924bfbdef8a1f90/Lectures_others/MC/W_Placzek_2010/mmc02.pdf)
Supplement: mmc02 [file mmc02.pdf]

# Całkowanie metodami Monte Carlo

## „Od igły Buffona do metod redukcji wariancji”

- **Igła Buffona i metoda Monte Carlo typu „orzeł–reszka”.**
  - **Metoda podstawowa całkowania Monte Carlo.**
  - **Klasyczne metody redukcji wariancji.**
    - ▷ **Losowanie warstwowe.**
    - ▷ **Metoda średniej ważonej.**
    - ▷ **Metoda zmiennych kontrolnych.**
    - ▷ **Metoda zmiennych antytetycznych.**
- ⇒ <http://th-www.if.uj.edu.pl/~placzek/dydaktyka/MMC/>

## ► Igła Buffona (Buffon 1777, Laplace 1886):

Igłę o długości  $l$  rzuca losowo na poziomą płaszczyznę pokrytą równoległymi liniami prostymi o odstępach  $L$  ( $L \geq l$ ). Jeżeli rzucona igła przetnie linię, to liczymy „trafienie”, w przeciwnym wypadku liczymy „chybienie”. Przez zliczanie **trafień** i **chybień** wyznaczyć wartość liczby  $\pi$ .

### Eksperyment:

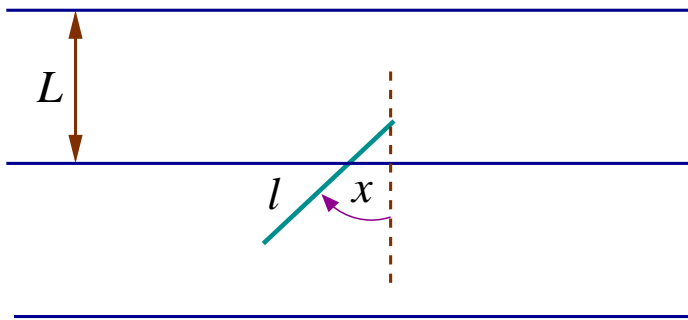

$n$  – liczba trafień,

$N$  – liczba prób

(„trafienia” + „chybienia”)

### Teoria:

$x$  – kąt między igłą a normalną do linii,  $x \in \mathcal{U}(0, \pi)$ ,

$\Rightarrow$  funkcja gęstości prawdopodobieństwa zmiennej  $x$ :

$$\rho(x) = \frac{1}{\pi},$$

$p(x)$  – prawdopodob. „trafienia” dla danej wartości  $x$ :

$$p(x) = \frac{l}{L} |\cos x|,$$

$\Rightarrow$  Całkowite prawdopodobieństwo „trafienia”:

$$P = E[p(x)] = \int_0^\pi p(x)\rho(x)dx = \frac{2l}{\pi L}.$$

► **Prawo wielkich liczb (PWL):**  $\hat{P} = \frac{n}{N} \xrightarrow{N \rightarrow \infty} P = \frac{2l}{\pi L} \implies \boxed{\hat{\pi} = \frac{2Nl}{nL} \xrightarrow{N \rightarrow \infty} \pi}.$

- **Monte Carlo typu „orzeł–reszka”**

Dzięki symetrii  $p(x)$  bierzemy:  $0 < x < \frac{\pi}{2}$ .

▷ **Algorytm:**

Generujemy równomiernie dwie zmienne:

$(x, y) : 0 < x < \frac{\pi}{2}$  i  $0 < y < 1$ .

$$y \begin{cases} \leq p(x) : \text{trafienie,} \\ > p(x) : \text{chybienie.} \end{cases}$$

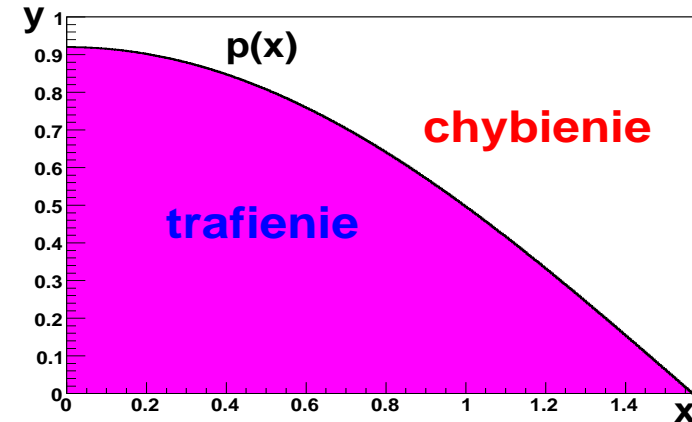

Zdefiniujemy funkcję wagową:  $w(x, y) = \Theta(p(x) - y)$ ,

gdzie:  $\Theta(z) = 0$  dla  $z < 0$  i  $\Theta(z) = 1$  dla  $z \geq 0$  (funkcja schodkowa).

▷ Funkcja gęstości prawdopodobieństwa:  $\rho(x, y) = \rho(x)g(y) = \frac{2}{\pi} \cdot 1$ .

⇒ Całkowite prawdopodobieństwo:

$$P = E(w) = \int w(x, y)\rho(x, y)dxdy = \frac{2l}{\pi L} \xrightarrow{N \rightarrow \infty} \hat{P} = \frac{1}{N} \sum_{i=1}^N w(x_i, y_i) = \frac{n}{N}.$$

⇒ Odchylenie standardowe estymatora Monte Carlo  $\hat{P}$ :

$$\sigma = \frac{1}{\sqrt{N}} \sqrt{P(1 - P)} \xrightarrow{N \rightarrow \infty} \hat{\sigma} = \frac{1}{\sqrt{N - 1}} \sqrt{\frac{n}{N} \left(1 - \frac{n}{N}\right)}.$$

Szacowanie prawdopodobieństwa (całki) jako stosunku liczby trafień (sukcesów) do liczby prób losowych nazywa się metodą „orzeł–reszka” („sukces–porażka”; ang. ‘hit–or–miss’).

- Jaka jest oczekiwana dokładność po  $N$  próbach?  
 $n$  – liczba trafień spełnia rozkład dwumianowy (Bernoulliego).

► Rozkład dwumianowy:

$$\mathcal{P}(n) = \binom{N}{n} P^n (1 - P)^{N-n}, \quad n = 0, 1, \dots, N,$$

gdzie:  $P$  – prawdopodobieństwo sukcesu,  $N$  – liczba prób.

- ▷ Wartość oczekiwana:  $E(n) = NP$ ,
- ▷ Wariancja:  $V(n) = NP(1 - P)$ .

► „Igła Buffona” – wartość oczekiwana i wariancja estymatora MC prawdopodobieństwa  $P$ :

$$E(\hat{P}) = P, \quad V(\hat{P}) = \frac{P(1 - P)}{N}.$$

⇒ **Ćw. A9:** Pokazać powyższe.

„Igła Buffona”: niech  $l = L$  (dla prostoty)

► Estymator MC liczby  $\pi$  i jego odchylenie standardowe (teoretyczne):

$$\hat{\pi} = \frac{2N}{n}, \quad \sigma(\hat{\pi}) = \frac{1}{\sqrt{N}} \pi \sqrt{\frac{\pi}{2} - 1}.$$

⇒ Ćw. A10: Pokazać powyższe.

$$\implies \sigma_{\hat{\pi}}^{\text{orzeł-reszka}} \simeq \frac{2.374}{\sqrt{N}}$$

▷ To znaczy, że niepewność oszacowania liczby  $\pi$  jest:

|    |           |          |        |
|----|-----------|----------|--------|
| po | 100       | próbach: | 0.2374 |
| po | 10 000    | próbach: | 0.0237 |
| po | 1 000 000 | próbach: | 0.0024 |

→ Te niedokładności są bardzo duże!

**Czy możemy to poprawić?**

⇒ Ćw. N2.1: Wykonać komputerowe modelowanie problemu „igły Buffona”. Wyznaczać wartość liczby  $\pi$  metodą „orzeł–reszka” i wyliczać jej teoretyczne oraz praktyczne odchylenie standardowe. Obserwować zbieżność wyników do dokładnej wartości dla rosnącej liczby prób.

● **Podstawa: prawo wielkich liczb (PWL)**

$$\frac{1}{N} \sum_{i=1}^N f(x_i) \xrightarrow{N \rightarrow \infty} \frac{1}{b-a} \int_a^b f(x) dx = E(f)$$

▶ **Odchylenie standardowe (teoretyczne):**  $\sigma = \frac{1}{\sqrt{N}} \sqrt{[E(f^2) - E^2(f)]}$ .

Zdefiniujmy:  $w(x) = p(x) = \frac{l}{L} \cos x$  i generujmy  $x$  równomiernie w przedziale  $(0, \frac{\pi}{2})$ .

▷ Na podstawie PWL mamy:

$$P = \int w(x) \rho(x) dx = \int_0^{\pi/2} \left( \frac{l}{L} \cos x \right) \frac{2}{\pi} dx = \frac{2l}{\pi L} \stackrel{N \rightarrow \infty}{=} \frac{1}{N} \sum_{i=1}^N w(x_i).$$

▷ **Odchylenie standardowe estymatora MC liczby  $\pi$  dla  $l = L$ :**

$$\sigma_{\hat{\pi}}^P \simeq \frac{1.52}{\sqrt{N}} \quad \Rightarrow \text{Ćw. A11: Pokazać.}$$

**Metoda Monte Carlo szacowania całki w oparciu o prawo wielkich liczb nazywa się **metodą podstawową Monte Carlo** (ang. *crude Monte Carlo*).**

→ **Metoda podstawowa Monte Carlo jest bardziej wydajna niż metoda „orzeł–reszka”!**

▶ Ale metoda „orzeł–reszka” daje przypadki **nieważone** (tzn. ze stałą wagą = 1), podczas gdy metoda podstawowa daje przypadki **ważone** (tzn. ze zmienną wagą)!

● Twierdzenie:

**Metoda podstawowa Monte Carlo nie jest nigdy mniej wydajna niż metoda „orzeł–reszka”!**

▶ Dowód:

Niech  $I = \int_0^1 f(x) dx$  i  $0 \leq f(x) \leq 1$  (dla prostoty).

▷ Wariancja dla metody „orzeł–reszka”:  $V(\hat{I}_{\text{OR}}) = \frac{1}{N} (I - I^2)$ ,

▷ Wariancja dla metody podstawowej:  $V(\hat{I}_{\text{P}}) = \frac{1}{N} \left[ \int_0^1 f^2(x) dx - I^2 \right]$ ,

$\Rightarrow V(\hat{I}_{\text{OR}}) - V(\hat{I}_{\text{P}}) = \frac{1}{N} \left[ I - \int_0^1 f^2(x) dx \right] = \frac{1}{N} \int_0^1 f(x)[1 - f(x)] dx \geq 0$ . (c.n.d.)

$\rightarrow V(\hat{I}_{\text{OR}}) - V(\hat{I}_{\text{P}}) = 0$  tylko gdy  $f(x) \equiv 0$  lub  $f(x) \equiv 1$ , czyli dla funkcji schodkowej.

$\Rightarrow$  **Ćw. N2.2:** Używając metody „orzeł–reszka” oraz metody podstawowej MC policzyć całki:

$$\Phi = \int_0^1 \phi(x) dx, \quad \phi(x) = \frac{1}{\sqrt{2\pi}} e^{-\frac{x^2}{2}}; \quad \left( \Phi \simeq 0.341345, \int_0^1 \phi^2(x) dx \simeq 0.118861 \right),$$

$$\Psi = \int \int_{x^2+y^2 \leq 1} \psi(x, y) dx dy, \quad \psi(x, y) = \frac{1}{4} \sqrt{1 - (x^2 + y^2)}.$$

Wyznaczyć teoretyczne i praktyczne odchylenia standardowe dla obu tych całek.

Porównać zbieżność obu metod Monte Carlo.

## Metoda podstawowa – przypadek ogólny

Niech  $x = (x_1, x_2, \dots, x_m)$  – wektor w  $m$ -wymiarowej przestrzeni, tzn.  $x \in \mathbb{R}^m$ ,

$\Omega \subset \mathbb{R}^m$  – pewien obszar w  $m$ -wymiarowej przestrzeni,

$V \equiv \mathfrak{M}(\Omega)$  – objętość tego obszaru.

$$I = \int_{\Omega} f(x) dx = V \int_{\Omega} f(x) \frac{dx}{V} = V \int_{\Omega} f(x) dp(x) \stackrel{\text{ozn.}}{=} V J = V E(f).$$

► Estymator MC:

$$\hat{J} = \frac{1}{N} \sum_{i=1}^N f(x^{(i)}), \quad x^{(i)} \in \mathcal{U}(\Omega), \text{ tzn. rozkład równomierny na } \Omega.$$

► Odchylenie standardowe:

$$\hat{\sigma}(\hat{J}) = \frac{1}{\sqrt{N(N-1)}} \sqrt{\sum_{i=1}^N f^2(x^{(i)}) - \frac{1}{N} \left[ \sum_{i=1}^N f(x^{(i)}) \right]^2}.$$

▷ Stąd dla estymatora całki  $I$  mamy:

$$\hat{I} = V \hat{J}, \quad \hat{\sigma}(\hat{I}) = V \hat{\sigma}(\hat{J}).$$



## Metoda „orzeł–reszka” – przypadek ogólny

Niech  $x = (x_1, x_2, \dots, x_m)$  – wektor w  $m$ -wymiarowej przestrzeni, tzn.  $x \in \mathbb{R}^m$ ,

$\Omega \subset \mathbb{R}^m$  – pewien obszar w  $m$ -wymiarowej przestrzeni,

$V \equiv \mathfrak{M}(\Omega)$  – objętość tego obszaru.

$$I = \int_{\Omega} f(x) dx = \int_{\Omega} dx \int_0^{f_{\max}} dy \Theta(f(x) - y) = V f_{\max} \int_{\Omega} \frac{dx}{V} \int_0^{f_{\max}} \frac{dy}{f_{\max}} \Theta(f(x) - y),$$

gdzie:  $(x, y) \in \mathcal{U}(\Omega \times [0, f_{\max}])$ .

▷ Oznaczamy:

$$K = \int_{\Omega} \frac{dx}{V} \int_0^{f_{\max}} \frac{dy}{f_{\max}} \Theta(f(x) - y) = E(\Theta),$$

▷ Losujemy  $(x, y) \in \mathcal{U}(\Omega \times [0, f_{\max}])$  i sprawdzamy:  $y \begin{cases} \leq f(x) & \text{– trafienie: waga} = 1, \\ > f(x) & \text{– chybienie: waga} = 0. \end{cases}$

► Niech:  $N$  – liczba prób,  $n$  – liczba trafień  $\longrightarrow$  estymator MC i jego odchylenie standardowe:

$$\hat{K} = \frac{n}{N}, \quad \hat{\sigma}(\hat{K}) = \frac{1}{\sqrt{N-1}} \sqrt{\hat{K}(1-\hat{K})} \implies \hat{I} = f_{\max} V \hat{K}, \quad \hat{\sigma}(\hat{I}) = f_{\max} V \hat{\sigma}(\hat{K}).$$

- Niepewność obliczania całki metodą Monte Carlo:

$$\sigma = \frac{1}{\sqrt{N}} \sqrt{V(f)}.$$

Ta niepewność może być **zmniejszona** przez zwiększanie  $N$ , tzn. rozmiaru próby losowej  
→ **bardzo powolna poprawa (zbieżność)!**

$$\sigma \sim \frac{1}{\sqrt{N}}.$$

- ▶ **Inny sposób – zmniejszanie wariancji funkcji:**  $V(f)$ ,

$$\sigma \sim \sqrt{V(f)}.$$

(Por. Metoda „orzeł–reszka” ↔ Metoda podstawowa)

- ▶ **Dlatego ważne jest poszukiwanie metod redukcji wariancji!**

- ▷ **Poznamy cztery podstawowe klasyczne metody redukcji wariancji:**

- 1) Losowanie warstwowe (ang. stratified sampling),
- 2) Metoda średniej ważonej (ang. importance sampling),
- 3) Metoda zmiennych kontrolnych (ang. control variates),
- 4) Metoda zmiennych antytetycznych (ang. antithetic variates).

Intuicyjnie, duże niepewności całkowania metodami Monte Carlo są spowodowane tym, że funkcja podcałkowa różni się znacznie od rozkładu płaskiego → **duże fluktuacje wartości funkcji w oszacowaniu MC całki!**

► **Możliwe rozwiązanie:** Sprawić by rozkład wartości funkcji wchodzących do estymatora MC całki był bardziej równomierny.

- **Losowanie warstwowe**

▷ Oparte o fundamentalną własność całki Riemanna:

$$I = \int_0^1 f(u) du = \int_0^a f(u) du + \int_a^1 f(u) du, \quad 0 < a < 1.$$

► **Ogólny schemat:**

Obszar całkowania dzielimy na pewną liczbę podobszarów. W  $j$ -tym podobszarze, którego objętość wynosi  $\omega_j$  losujemy  $n_j$  punktów według rozkładu równomiernego. Następnie tworzymy sumy częściowe wartości funkcji w wylosowanych punktach dla każdego podobszaru i te sumy dodajemy do siebie z wagami proporcjonalnymi do  $\omega_j$  i odwrotnie proporcjonalnymi do  $n_j$ .

Niech:

$$I = \int_{\Omega} f(x) dx, \quad \Omega = \bigcup_{i=1}^k \omega_j,$$

a całka po  $j$ -ym podobszarze:

$$I_j = \int_{\omega_j} f(x) dx \implies I = \sum_{j=1}^k I_j.$$

▷  $p_j$  – jednorodny rozkład w  $j$ -ym podobszarze:  $dp_j = \frac{dx}{\omega_j} \implies I_j = \omega_j \int_{\omega_j} f(x) dp_j.$

► Całka  $I_j$  jest obliczana w oparciu o metodę podstawową MC – jej estymator MC wynosi:

$$\hat{I}_j = \frac{\omega_j}{n_j} \sum_{i=1}^{n_j} f(x_j^{(i)}).$$

► Punkty w każdym podobszarze losowane są niezależnie, zatem całkowity estymator MC wynosi:

$$\hat{I} = \sum_{j=1}^k \hat{I}_j = \sum_{j=1}^k \frac{\omega_j}{n_j} \sum_{i=1}^{n_j} f(x_j^{(i)}),$$

a wariancja:

$$V(\hat{I}) = \sum_{j=1}^k \frac{\omega_j^2}{n_j} V_j(f) \quad \rightarrow \text{jej estymator MC: } \hat{V}(\hat{I}) = \sum_{j=1}^k \frac{\omega_j^2}{n_j} \hat{V}_j(f),$$

gdzie  $V_j(f)$  jest wariancją funkcji  $f$  w  $j$ -ym podobszarze.

⇒ **Ćw. A12:** Pokazać, że estymator MC  $\hat{I}$  dla losowania warstwowego jest estymatorem nieobciążonym oraz udowodnić wzór na wariancję teoretyczną  $V(\hat{I})$  tego estymatora.

**Można pokazać, że podział na równomierne warstwy ( $\omega_j = \omega_l$  i  $n_j = n_l$  dla wszystkich  $j, l$ ) nie powoduje zwiększenia wariancji i generalnie prowadzi do jej zmniejszenia, jeżeli tylko wartości oczekiwane funkcji są różne w różnych warstwach.**

→ Np. podział na dwie równe warstwy:  $\omega_1 = \omega_2 = \frac{1}{2}\Omega$ ,  $n_1 = n_2 = \frac{1}{2}N$ ,

$$\Rightarrow V(\hat{I}_P) - V(\hat{I}_{LW}) = \frac{1}{N} \left[ \int_{\omega_1} f(x) dx - \int_{\omega_2} f(x) dx \right]^2 \geq 0,$$

gdzie:  $\hat{I}_P$  – estymator MC całki dla metody podstawowej, a  $\hat{I}_{LW}$  – estymator MC tej całki dla losowania warstwowego.

⇒ **Ćw. A13:** Udowodnić powyższe.

► **Podział na równomierne warstwy jest najbezpieczniejszym wyborem kiedy nie wiemy nic o funkcji podcałkowej!**

► Przyjmijmy  $l = L$  i wykonajmy podział na równomierne warstwy dla  $k = 5$  podobszarów:

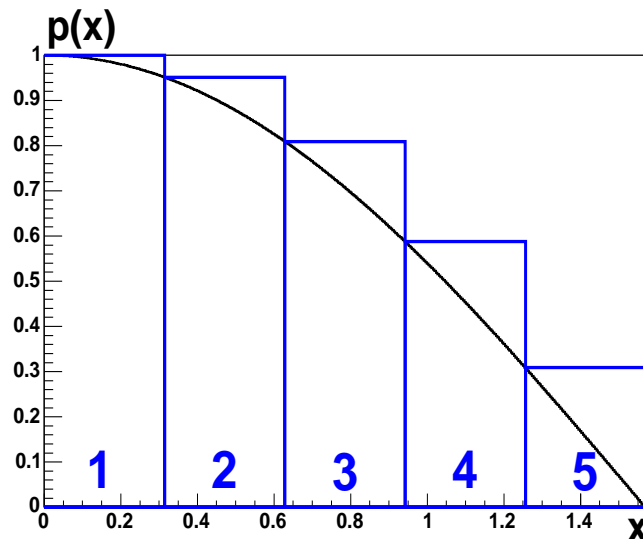

Mamy:  $\omega_j = \frac{\Omega}{5} = \frac{\pi}{10}$  i  $n_j = \frac{N}{5}$ .

► Estymator MC prawdopodobieństwa trafienia:

$$\hat{P} = \frac{1}{\Omega} \sum_{j=1}^5 \frac{\omega_j}{n_j} \sum_{i=1}^{N/5} p(x_j^{(i)}) = \frac{1}{N} \sum_{i=1}^N p(x_i).$$

► Odchylenie standardowe estymatora MC liczby  $\pi$ :

$$\sigma_{\hat{\pi}}^{\text{LW}} \simeq \frac{0.345}{\sqrt{N}} < \sigma_{\hat{\pi}}^{\text{P}} \simeq \frac{1.52}{\sqrt{N}}.$$

- W powyższym podziale na równomierne warstwy generowaliśmy te same liczby punktów w każdym podobszarze, niezależnie od ich wkładu do pełnej całki.
- To można poprawić albo przez generowanie liczby punktów **proporcjonalnie** do pól niebieskich prostokątów, albo przez podział obszaru całkowania na podobszary, dla których odpowiednie niebieskie prostokąty mają **jednakowe pola**.

⇒ **Ćw. N3.1:** W oparciu o metodę **losowania warstwowego** policzyć całki  $\Phi$  i  $\Psi$ , dzieląc obszary całkowania na 5 warstw o równych objętościach (odcinki dla  $\Phi$ , współśrodkowe pierścienie dla  $\Psi$ ). Obliczać praktyczne odchylenia standardowe i porównywać szybkość zbieżności tej metody oraz metody podstawowej.

**Duża zmienność wartości funkcji  $f$  prowadzi do dużej niepewności oszacowania MC jej całki.**

► Rachunki MC byłyby bardziej efektywne gdyby każdy punkt miał prawie tę samą wartość funkcji.

→ **Rozwiązanie:** zamiana zmiennej(ych) całkowania:

$$f(x) dx \longrightarrow \frac{f(x)}{g(x)} dG(x), \quad \text{gdzie } g(x) = \frac{dG(x)}{dx} \text{ – jacobian.}$$

- **Schemat rachunku MC:**

(i) Punkty generujemy według rozkładu  $G(x)$  zamiast równomiernie.

(ii) Dla każdego punktu liczymy **wagę**:  $w(x) = f(x)/g(x)$ ,  $g$  – tzw. **funkcja próbna**.

(iii) Obliczamy wartość oczekiwaną  $\hat{E}_G(w)$  i wariancję  $\hat{V}_G(w)$  dla całej próby losowej.

► Jeżeli  $g(x)$  jest odpowiednio dobrana, to wariancja wagi  $w = f/g$  może być znacząco mniejsza niż wariancja funkcji  $f$ ! (możemy mieć nawet:  $w = \text{const} \Rightarrow \hat{V}_G(w) = 0!$ ).

► Można otrzymać przypadki nieważone przez zastosowanie metody „orzeł–reszka” dla  $w(x)$ .

- **Wymagania:**

▷ Funkcja  $g(x)$  powinna być nieujemna na całym obszarze i całkowna analitycznie.

▷ Dystrybuanta  $G(x)$  odwracalna analitycznie (**niewielka liczba znanych funkcji**) lub powinien być dostępny generator rozkładu  $g$ . Możliwe jest też numeryczne odwracanie funkcji, ale zwykle jest ono wolniejsze, a także może być mniej dokładne i mniej stabilne.

▷ Niech  $l = L$ , dla prostoty.

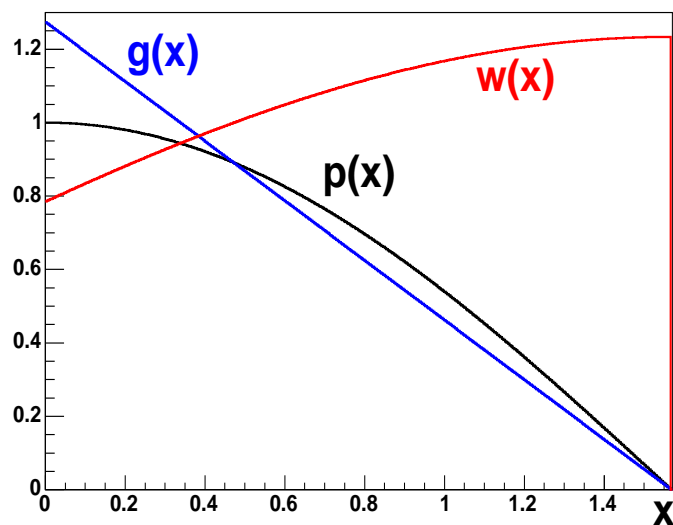

Weźmy:  $g(x) = \frac{4}{\pi} \left(1 - \frac{2}{\pi}x\right)$ .

⇒  $G(x) = \frac{4}{\pi}x \left(1 - \frac{x}{\pi}\right)$  – odwracalna analitycznie.

► Funkcja wagowa:

$$w(x) = \frac{p(x)}{g(x)} = \frac{\pi}{4} \frac{\cos x}{1 - 2x/\pi} \quad \text{i} \quad \frac{\pi}{4} \leq w \leq \frac{\pi^2}{8}.$$

▷ Odchylenie standardowe estymatora MC liczby  $\pi$ :

$$\sigma_{\hat{\pi}}^{\text{ŚW}} \simeq \frac{0.406}{\sqrt{N}} < \sigma_{\hat{\pi}}^{\text{P}} \simeq \frac{1.52}{\sqrt{N}}.$$

► Możemy nawet uzyskać lepszy wynik przez wybór:  $g(x) = \cos x$ .

▷ Wówczas:  $G(x) = \sin x$  – odwracalna analitycznie.

► Funkcja wagowa:  $w(x) \equiv 1$  !!!

▷ To znaczy, że możemy obliczyć naszą całkę dokładnie, bo wariancja:  $V(w) = 0$  !!!

- Metoda średniej ważonej jest jedną z najbardziej podstawowych i użytecznych technik Monte Carlo, umożliwiającą osiągnięcie znacznej redukcji wariancji.
- Jest to jedyna znana metoda usuwania nieskończonych osobliwości funkcji  $f$  – przez wybór funkcji próbnej  $g$  z analogicznymi osobliwościami w tych samych miejscach.



## Wady metody średniej ważonej:

- Klasa funkcji, które są całkowne i odwracalne analitycznie jest mała (głównie funkcje trygonometryczne, wykładnicze, wielomiany bardzo niskiego stopnia oraz ich kombinacje).
- Liczenie całek wielowymiarowych jest, poza najprostszymi funkcjami, bardzo skomplikowane – najczęściej jest sprowadzane do odpowiednich kombinacji całkowań jednowymiarowych.
- Może być niestabilna, np. kiedy funkcja  $g$  staje się bardzo mała, to wariancja  $V(f/g)$  może stać się bardzo duża! (o ile funkcja  $f$  nie jest odpowiednio mała w tych samych obszarach).

▶ Niebezpieczeństwo:  $g$  zeruje się w obszarach, gdzie  $f \neq 0 \implies V(f/g) = \infty!$

⇒ **Ćw. N3.2**: Korzystając z metody **średniej ważonej** policzyć całkę  $\Phi$ . Jako **funkcji próbnych** użyć **funkcji liniowych**. Zastosować dwa sposoby normalizacji funkcji próbnych: **addytywny** i **multiplikatywny**. Obliczać praktyczne odchylenia standardowe i porównywać szybkość zbieżności tej metody oraz metod poprzednich.

▷ Podobna do metody średniej ważonej, z tym że funkcja próbna  $g$  jest tu **odejmowana** od  $f$ .

▶ Podstawa matematyczna – liniowość całki:

$$\int f(x) dx = \int [f(x) - g(x)] dx + \int g(x) dx .$$

▷ Funkcja  $g$  musi być dobrana tak, że całka  $\int g(x) dx$  jest znana, najlepiej analitycznie.

⇒ **Niepewność rachunku MC pochodzi tylko od obliczania całki:**  $\int [f(x) - g(x)] dx$ .

▶ **Wariancja:**

$$V(f - g) \xrightarrow{g \rightarrow f} 0 .$$

▶ **Zalety:**

- Bardziej stabilna od metody średniej ważonej, ponieważ zera funkcji  $g$  nie powodują osobliwości dla  $(f - g)$ .
- Całka funkcji próbnej  $g$  nie musi być odwracalna analitycznie.

▶ **Wady:**

▷ **Nadaje się tylko do liczenia całek, nie można jej stosować do generowania rozkładu  $f(x)$ .**

⇒ **Ćw. N3.3:** W oparciu o metodę **zmiennych kontrolnych** policzyć całkę  $\Phi$ .

Jako **funkcji próbnych** użyć **funkcji liniowych**, jak ćwiczeniu dla metody średniej ważonej. Obliczać praktyczne odchylenia standardowe i porównywać szybkość zbieżności tej metody oraz metod poprzednich.

- Zwykle w rachunkach MC używa się liczb (punktów) losowych, które są **niezależne** (przynajmniej **w zasadzie!**).
- Metoda **zmiennych antytetycznych** celowo używa **punktów skorelowanych**, wykorzystując fakt, że te korelacje mogą być **ujemne**.

Niech:  $f'$ ,  $f''$  – pewne funkcje,

▷ **Wariancja:**  $V(f' + f'') = V(f') + V(f'') + 2Cov(f', f'')$ .

▶ **Jeżeli**  $Cov(f', f'') < 0 \implies V(f' + f'') < V(f') + V(f'')$ .

To znaczy, jeżeli da się tak dobrać wybór punktów, że  $f'$  i  $f''$  będą **ujemnie skorelowane**, to można osiągnąć **znaczłą redukcję wariancji!**

## ▶ Wady:

- Wymaga to jednak **znajomości funkcji**  $f$  i **nie jest łatwo** podać ogólne metody uzyskiwania takich ujemnych korelacji.
- Trudno ją uogólnić na całki wielowymiarowe (znane są rozwiązania tylko dla pewnych szczególnych funkcji).
- Nie nadaje się do generowania rozkładów  $f(x)$ .

## PRZYKŁAD:

Niech  $f(x)$  – monotonicznie rosnąca funkcja zmiennej  $x \in [0, 1]$ ,

$\Rightarrow f(x)$  i  $f(1-x)$  – **ujemnie skorelowane!** (bo jeżeli  $f(x) \nearrow$  to  $f(1-x) \searrow$  i odwrotnie.)

Weźmy  $\tilde{f}(x) = \frac{1}{2} [f(x) + f(1-x)]$ .

Niech:

$$I \equiv \int_0^1 f(x) dx,$$

$$\Rightarrow I = \frac{1}{2} \left[ \int_0^1 f(x) dx + \int_0^1 f(1-x) dx \right] = \int_0^1 \frac{1}{2} [f(x) + f(1-x)] dx$$

$$= \int_0^1 \tilde{f}(x) dx = E(\tilde{f}) \xleftarrow{N \rightarrow \infty} \hat{I} = \frac{1}{2N} \sum_{i=1}^N [f(x_i) + f(1-x_i)].$$

▷ Uzyskujemy **redukcję wariancji**:

$$V(\tilde{f}) < V(f).$$

$\Rightarrow$  **Ćw. N3.4:** Korzystając z metody **zmiennych antytetycznych** policzyć całkę  $\Phi$  i jej praktyczne odchylenie standardowe. Jako estymatora funkcji użyć:  $\tilde{\phi}(x) = \frac{1}{2} [\phi(x) + \phi(1-x)]$ .

Porównać efektywność tej metody oraz metod poprzednich.
